# Supplementary material
Source: PubMed Central journal article supplement (PMC6754343)
Supplement: NIHMS123763-supplement-01.pdf [file NIHMS123763-supplement-01.pdf]

**Supplemental Table 1. Primers**

| <b>Gene name</b> | <b>LP</b>                | <b>RP</b>                  |
|------------------|--------------------------|----------------------------|
| <i>PHERES1</i>   | CAATGGTGTATTTCGTAGGGTTGA | TGCATCCACAACAGTAGGAGCTA    |
| <i>PHERES2</i>   | TACCTCTTCCTATTGTTGCGAATG | CCCTCGTCCTCTCCATCAT        |
| <i>AGL62</i>     | TGCTGCTTTTGGGATTGATG     | CTGGTTGTAGTTGAAGGCATTTATGT |
| <i>AGL40</i>     | GGTCAAAGTTCTGGCGTGAT     | CGGAACGAGAACTCCATCAT       |
| <i>AGL35</i>     | CGATGTCGGTGATGGACAAG     | TTCCGCAACTTCTTCCAAGAC      |
| <i>AGL36</i>     | CTGCGGTAAGTCTTCCAGTA     | TAGTTGATGGTAGTTGTAGCAGT    |
| <i>AGL90</i>     | AACGGGATATTCAAGAAACT     | ATGGGTTTCTTGATCCATCAT      |
| <i>FIS2</i>      | GGTGCAGGCTAAAAGATTG      | CGATCACCTTTGTTTTTCGT       |
| <i>MEDEA-AT</i>  | CACAAAACACTACAAAAACAAAG  | TAAACAAGGGCATTGATATCC      |
| <i>MEDEA-AA</i>  | TAAGGAAGAGGCACCATTATCT   | AACCGGTCTACATCTTTGGA       |
| <i>ROC1</i>      | AAAACCCCTTCACTTCAA       | CACGACCTGCCCAAACAC         |
| <i>18S</i>       | TCCTAGTAAGCGCGAGTCATCA   | CGAACACTTCACCGGATCAT       |

**Supplemental Table 2. Parental specific expression of *AGL* genes and *FWA***

|          | <b>2x2x/4x2x-rep1</b> | <b>2x2x/4x2x-rep2</b> |
|----------|-----------------------|-----------------------|
| phe1-at  | 15.2                  | 10.4                  |
| phe1-aa  | 120.5                 | 77.5                  |
| phe2-at  | 9.3                   | 4.9                   |
| phe2-aa  | 20.8                  | 12.8                  |
| agl62-at | 13.0                  | 8.9                   |
| agl62-aa | 115.0                 | 64.4                  |
| agl90-at | 73.1                  | 54.0                  |
| agl90-aa | 20.5                  | 25.4                  |
| agl35-at | 11.9                  | 6.0                   |
| agl35-aa | 1.5                   | 0.3                   |
| agl40-at | 7.2                   | 4.7                   |
| agl40-aa | 17.2                  | 10.4                  |
| agl36-at | 96.2                  | 56.9                  |
| agl36-aa | 19.3                  | 20.7                  |
| fwa-at   | 0.9                   | 0.7                   |
| fwa-aa   | 1.6                   | 1.4                   |
